# Supplementary material for: Rosmarinic acid reverses non‐small cell lung cancer cisplatin resistance by activating the MAPK signaling pathway
Source: PubMed Central journal article supplement — Phytother Res. 2020 Jan 27;34(5):1142–53. doi: 10.1002/ptr.6584 (PMC7217221; doi:10.1002/ptr.6584), 2020-01-27
Supplement: PTR-34-1142-s001.pdf [file PTR-34-1142-s001.pdf]

**Supplement table 1 Potential targets of Rosmarinic acid by PharmaMapper**

| <b>PDB ID</b> | <b>Uniplot</b> | <b>Num Feature</b> | <b>Fit</b> | <b>Norm Fit</b> | <b>Z score</b> |
|---------------|----------------|--------------------|------------|-----------------|----------------|
| 1udw_v        | Q9BZX2         | 14                 | 6.018      | 0.4298          | 1.28326        |
| 1p60_v        | DCK            | 9                  | 5.119      | 0.5687          | 1.04913        |
| 5p21_v        | RASH           | 15                 | 5.02       | 0.3347          | 0.412644       |
| 1ekv_v        | O15382         | 8                  | 4.663      | 0.5829          | 3.93784        |
| 1db1_v        | VDR            | 13                 | 4.623      | 0.3556          | 1.24492        |
| 2dux_v        | ALDR           | 12                 | 4.533      | 0.3777          | 1.26303        |
| 1nb0_v        | Q969G6         | 11                 | 4.487      | 0.4079          | 1.78284        |
| 1jtv_v        | P14061         | 8                  | 4.483      | 0.5604          | 0.878525       |
| 1cbs_v        | P29373         | 10                 | 4.482      | 0.4482          | 0.403067       |
| 1t67_v        | HDAC8          | 6                  | 4.464      | 0.744           | 3.56174        |
| 1b0f_v        | ELNE           | 9                  | 4.345      | 0.4828          | 1.65395        |
| 1b55_v        | BTK            | 12                 | 4.344      | 0.362           | 1.57299        |
| 1unq_v        | AKT1           | 12                 | 4.332      | 0.361           | 2.03818        |
| 2pe1_v        | PDPK1          | 7                  | 4.305      | 0.6151          | 0.948726       |
| 1pgt_v        | GSTP1          | 14                 | 4.248      | 0.3035          | 0.552807       |
| 1zpb_v        | FA11           | 8                  | 4.213      | 0.5267          | 3.00491        |
| 1i44_v        | INSR           | 8                  | 4.186      | 0.5233          | 1.01807        |
| 1q3d_v        | GSK3B          | 7                  | 4.181      | 0.5972          | 2.03234        |
| 1q1z_v        | O00204         | 10                 | 4.177      | 0.4177          | 0.557438       |
| 1st0_v        | Q96C86         | 10                 | 4.177      | 0.4177          | 2.85451        |
| 1bnv_v        | CAH2           | 7                  | 4.143      | 0.5919          | 2.57249        |
| 1m4h_v        | BACE1          | 18                 | 4.136      | 0.2298          | 1.05651        |
| 1fkg_v        | FKB1A          | 7                  | 4.122      | 0.5889          | 2.49239        |
| 1kao_v        | P10114         | 14                 | 4.1        | 0.2928          | 0.560214       |
| 1pkw_v        | P08263         | 9                  | 4.084      | 0.4538          | 2.22608        |
| 1ipb_v        | P06730         | 10                 | 4.081      | 0.4081          | 1.55714        |
| 1bzy_v        | P00492         | 12                 | 4.075      | 0.3396          | 1.05195        |
| 2bel_v        | DHI1           | 10                 | 4.072      | 0.4072          | 1.36559        |
| 1ro6_v        | PDE4B          | 5                  | 4.07       | 0.814           | 3.32739        |
| 1ph0_v        | PTN1           | 12                 | 4.063      | 0.3386          | 2.58515        |
| 1h28_v        | CCNA2          | 6                  | 4.062      | 0.6771          | 2.5723         |
| 1biw_v        | MMP3           | 8                  | 4.043      | 0.5054          | 1.70066        |
| 1ad8_v        | THRB           | 9                  | 4.027      | 0.4475          | 1.79757        |
| 1e9d_v        | KTHY           | 10                 | 4.02       | 0.402           | 1.50382        |
| 3ewh_v        | NONE           | 10                 | 3.998      | 0.3998          | 1.61545        |
| 2jdv_v        | P00517         | 8                  | 3.981      | 0.4976          | 2.34795        |
| 1r1h_v        | NEP            | 10                 | 3.957      | 0.3957          | 0.208426       |
| 1gs4_v        | ANDR           | 8                  | 3.943      | 0.4929          | 1.06485        |
| 1jaq_v        | MMP8           | 7                  | 3.942      | 0.5631          | 3.10326        |
| 1r55_v        | ADA33          | 10                 | 3.931      | 0.3931          | 1.09332        |
| 1mc5_v        | ADHX           | 7                  | 3.921      | 0.5601          | 0.593645       |
| 1isj_v        | BST1           | 7                  | 3.915      | 0.5593          | 2.95056        |
| 1y2k_v        | PDE4D          | 7                  | 3.897      | 0.5568          | 1.65362        |
| 1yz3_v        | PNMT           | 11                 | 3.89       | 0.3537          | 1.20507        |
| 2bdj_v        | SRC            | 6                  | 3.89       | 0.6484          | 2.06578        |
| 1jv1_v        | Q16222         | 12                 | 3.887      | 0.3239          | 1.27828        |
| 1m48_v        | IL2            | 7                  | 3.886      | 0.5552          | 1.90309        |

|        |        |    |       |        |          |
|--------|--------|----|-------|--------|----------|
| 1b3o_v | IMDH2  | 5  | 3.882 | 0.7763 | 2.58628  |
| 3kiv_v | APOA   | 5  | 3.881 | 0.7761 | 1.34992  |
| 1osf_v | HS90A  | 12 | 3.88  | 0.3233 | 0.780015 |
| 2hog_v | CHK1   | 6  | 3.874 | 0.6457 | 2.62786  |
| 1dug_v | FIBG   | 11 | 3.867 | 0.3515 | 0.876719 |
| 1awb_v | IMPA1  | 6  | 3.861 | 0.6435 | 0.48347  |
| 1nms_v | CASP3  | 10 | 3.86  | 0.386  | 1.08394  |
| 1hnl_v | P61626 | 8  | 3.86  | 0.4825 | 1.60441  |
| 1l6m_v | NGAL   | 4  | 3.856 | 0.9639 | 2.83074  |
| 1hi3_v | P10153 | 9  | 3.852 | 0.4279 | 1.23605  |
| 1l9n_v | TGM3   | 8  | 3.85  | 0.4813 | 0.82217  |
| 1efh_v | Q06520 | 11 | 3.846 | 0.3496 | 0.840279 |
| 1d2s_v | SHBG   | 8  | 3.843 | 0.4803 | 0.641958 |
| 3bbt_v | ERBB4  | 6  | 3.819 | 0.6365 | 2.01918  |
| 1y91_v | P24941 | 8  | 3.81  | 0.4763 | 1.2732   |
| 2fpy_v | PYRD   | 9  | 3.806 | 0.4229 | 0.741927 |
| 1wlj_v | ISG20  | 5  | 3.804 | 0.7608 | 2.14615  |
| 2bx8_v | ALBU   | 5  | 3.803 | 0.7607 | 1.88566  |
| 1men_v | PUR2   | 8  | 3.8   | 0.475  | 1.38977  |
| 1s9j_v | MP2K1  | 9  | 3.797 | 0.4219 | 0.450433 |
| 1h0c_v | SPYA   | 7  | 3.79  | 0.5414 | 1.53018  |
| 1tu6_v | CATK   | 9  | 3.786 | 0.4207 | 0.06255  |
| 1gw6_v | LKHA4  | 9  | 3.786 | 0.4206 | 1.30355  |
| 1imx_v | P01343 | 7  | 3.777 | 0.5396 | 1.50734  |
| 1cm0_v | Q92831 | 9  | 3.777 | 0.4196 | 2.19269  |
| 2can_v | OAT    | 10 | 3.773 | 0.3773 | 1.57164  |
| 1tdi_v | Q16772 | 9  | 3.769 | 0.4187 | 1.20739  |
| 1pbk_v | FKBP3  | 11 | 3.767 | 0.3425 | 2.01736  |
| 1q4x_v | P10828 | 9  | 3.765 | 0.4183 | 0.538007 |
| 2og8_v | LCK    | 11 | 3.759 | 0.3417 | 0.960124 |
| 1i7b_v | DCAM   | 8  | 3.757 | 0.4696 | 2.27498  |
| 1wt2_v | P16442 | 10 | 3.756 | 0.3756 | 1.10732  |
| 1wma_v | CBR1   | 5  | 3.753 | 0.7507 | 2.43605  |
| 3ccw_v | HMDH   | 8  | 3.753 | 0.4691 | 1.94955  |
| 1q0b_v | KIF11  | 10 | 3.742 | 0.3742 | 1.05704  |
| 1ihi_v | AK1C2  | 7  | 3.741 | 0.5345 | 0.36633  |
| 1ua2_v | P50613 | 8  | 3.741 | 0.4676 | 1.75809  |
| 1sd2_v | Q13126 | 7  | 3.73  | 0.5329 | 1.36029  |
| 3ens_v | P00742 | 8  | 3.73  | 0.4662 | 2.35209  |
| 1olm_v | O76054 | 10 | 3.729 | 0.3729 | 1.24667  |
| 1tft_v | XIAP   | 7  | 3.728 | 0.5326 | 2.12931  |
| 1p9a_v | P07359 | 8  | 3.727 | 0.4659 | 2.61236  |
| 3be2_v | P35968 | 8  | 3.723 | 0.4654 | 1.04522  |
| 1hna_v | GSTM2  | 10 | 3.722 | 0.3722 | 0.721598 |
| 1ig1_v | DAPK1  | 13 | 3.721 | 0.2862 | 0.225258 |
| 1p93_v | GCR    | 9  | 3.719 | 0.4132 | 1.34526  |
| 1o1v_v | FABP6  | 7  | 3.716 | 0.5308 | 0.846157 |
| 1jbq_v | P35520 | 7  | 3.715 | 0.5307 | 0.812328 |
| 1yvl_v | STAT1  | 8  | 3.714 | 0.4643 | 2.03818  |
| 1z6z_v | P35270 | 14 | 3.713 | 0.2652 | 1.03584  |
| 1ivh_v | P26440 | 12 | 3.708 | 0.309  | 1.45856  |

|        |        |    |       |        |          |
|--------|--------|----|-------|--------|----------|
| 1rw8_v | TGFR1  | 6  | 3.703 | 0.6171 | 1.03672  |
| 1m76_v | Q16836 | 8  | 3.701 | 0.4626 | 1.84818  |
| 1r5g_v | AMPM2  | 9  | 3.697 | 0.4107 | 1.70751  |
| 2pog_v | ESR1   | 4  | 3.696 | 0.9239 | 1.91292  |
| 1m6d_v | Q9UBX1 | 7  | 3.694 | 0.5277 | 1.80937  |
| 1bmq_v | CASP1  | 11 | 3.691 | 0.3355 | 0.950014 |
| 1tfg_v | TGFB2  | 9  | 3.689 | 0.4098 | 0.888752 |
| 1drf_v | DYR    | 8  | 3.688 | 0.461  | 1.96919  |
| 1jj7_v | Q03518 | 11 | 3.687 | 0.3352 | 0.282806 |
| 1q11_v | P54577 | 5  | 3.687 | 0.7374 | 2.19643  |
| 1elv_v | C1S    | 6  | 3.686 | 0.6143 | 1.89237  |
| 1khe_v | P35558 | 12 | 3.685 | 0.3071 | 0.512929 |
| 1jqd_v | P50135 | 10 | 3.683 | 0.3683 | 0.957489 |
| 1hms_v | FABPH  | 8  | 3.682 | 0.4603 | 0.392714 |
| 1n6l_v | RAB5A  | 9  | 3.679 | 0.4088 | 1.40764  |
| 2qtu_v | Q92731 | 5  | 3.679 | 0.7358 | 2.12938  |
| 1kw0_v | PH4H   | 7  | 3.675 | 0.5251 | 1.40609  |
| 1xo2_v | CDK6   | 5  | 3.672 | 0.7343 | 1.9901   |
| 1nus_v | Q96T66 | 9  | 3.668 | 0.4076 | 1.0437   |
| 1lt8_v | Q93088 | 8  | 3.667 | 0.4584 | 1.32815  |
| 1yzg_v | Q9D4P0 | 11 | 3.664 | 0.3331 | 0.579663 |
| 1pq3_v | ARGI2  | 7  | 3.663 | 0.5233 | 2.02245  |
| 1yj6_v | GSTM1  | 9  | 3.662 | 0.4069 | 1.44056  |
| 1rne_v | RENI   | 10 | 3.658 | 0.3658 | 1.53099  |
| 1z6t_v | APAF   | 11 | 3.658 | 0.3325 | 0.326155 |
| 2f4j_v | P00519 | 8  | 3.656 | 0.457  | 1.27868  |
| 1r6u_v | P23381 | 9  | 3.653 | 0.4059 | 1.22282  |
| 1ry0_v | AK1C3  | 7  | 3.653 | 0.5219 | 0.127496 |
| 1nst_v | P52848 | 9  | 3.652 | 0.4058 | 1.06999  |
| 1og5_v | CP2C9  | 6  | 3.645 | 0.6074 | 1.57649  |
| 2ble_v | GMPR1  | 10 | 3.64  | 0.364  | 0.606787 |
| 1b1e_v | ANGI   | 5  | 3.637 | 0.7273 | 1.68424  |
| 1u32_v | P36873 | 11 | 3.63  | 0.33   | 0.424609 |
| 1h9u_v | RXRB   | 10 | 3.629 | 0.3629 | 0.1414   |
| 1g55_v | O14717 | 10 | 3.629 | 0.3629 | 1.0981   |
| 1gmy_v | CATB   | 9  | 3.627 | 0.403  | 0.924549 |
| 1hrk_v | P22830 | 8  | 3.627 | 0.4533 | 0.799872 |
| 1p4r_v | PUR9   | 9  | 3.625 | 0.4028 | 0.791203 |
| 1yxu_v | PIM1   | 4  | 3.625 | 0.9062 | 2.54975  |
| 1iyh_v | PTGD2  | 8  | 3.623 | 0.4529 | 1.32335  |
| 2a3i_v | MCR    | 6  | 3.614 | 0.6024 | 1.68885  |
| 1gzv_v | Q9HAN9 | 7  | 3.612 | 0.516  | 1.43547  |
| 1w0h_v | Q8IV48 | 10 | 3.61  | 0.361  | 0.24866  |
| 1k7l_v | PPARA  | 8  | 3.605 | 0.4506 | 1.19736  |
| 1xh0_v | AMYP   | 13 | 3.603 | 0.2771 | 1.90958  |
| 1sl4_v | CD209  | 8  | 3.598 | 0.4498 | 2.19193  |
| 1ls6_v | ST1A1  | 12 | 3.592 | 0.2993 | 0.217258 |
| 1nqc_v | CATS   | 7  | 3.588 | 0.5126 | 1.3129   |
| 1itu_v | DPEP1  | 8  | 3.587 | 0.4484 | 0.334606 |
| 1eem_v | GSTO1  | 8  | 3.582 | 0.4478 | 1.14627  |
| 1cm8_v | MK12   | 9  | 3.582 | 0.398  | 0.916768 |

|        |        |    |       |        |            |
|--------|--------|----|-------|--------|------------|
| 1pr9_v | Q7Z4W1 | 10 | 3.58  | 0.358  | 1.89704    |
| 1c1y_v | RAF1   | 9  | 3.577 | 0.3974 | 0.852338   |
| 1dan_v | FA7    | 12 | 3.569 | 0.2974 | 0.493839   |
| 1uho_v | PDE5A  | 7  | 3.563 | 0.509  | 1.22185    |
| 2ojj_v | MK01   | 7  | 3.555 | 0.5079 | 1.08385    |
| 1nav_v | P10827 | 7  | 3.551 | 0.5072 | 0.635401   |
| 1t46_v | KIT    | 9  | 3.549 | 0.3944 | 0.636305   |
| 2oo8_v | TIE2   | 8  | 3.549 | 0.4436 | 0.609472   |
| 2c6q_v | Q9P2T1 | 10 | 3.54  | 0.354  | 0.618602   |
| 1ilh_v | NR1I2  | 8  | 3.54  | 0.4425 | 0.749754   |
| 1w83_v | Q16539 | 7  | 3.54  | 0.5057 | 0.857731   |
| 1qbk_v | RAN    | 11 | 3.532 | 0.3211 | 0.843705   |
| 1r5l_v | P49638 | 12 | 3.531 | 0.2943 | -0.157916  |
| 1nsi_v | NOS2   | 9  | 3.53  | 0.3922 | 0.697628   |
| 1u59_v | ZAP70  | 7  | 3.53  | 0.5042 | 0.879404   |
| 1dxo_v | NQO1   | 6  | 3.528 | 0.588  | 1.17388    |
| 1xoi_v | P06737 | 7  | 3.528 | 0.504  | 0.712521   |
| 1liy_v | KPYR   | 10 | 3.528 | 0.3528 | 0.439146   |
| 1q91_v | Q9NPB1 | 9  | 3.524 | 0.3915 | 0.324426   |
| 1db4_v | P14555 | 8  | 3.518 | 0.4398 | 0.558591   |
| 1p5j_v | P20132 | 7  | 3.518 | 0.5025 | 0.679409   |
| 1w2c_v | P23677 | 9  | 3.517 | 0.3908 | 1.21832    |
| 1nue_v | NDKB   | 10 | 3.516 | 0.3516 | 0.402476   |
| 2b7a_v | JAK2   | 7  | 3.511 | 0.5016 | 0.715773   |
| 1ore_v | P07741 | 7  | 3.505 | 0.5007 | 0.973679   |
| 1djl_v | Q13423 | 9  | 3.502 | 0.3891 | 1.05969    |
| 1dnc_v | P00390 | 8  | 3.498 | 0.4373 | 0.911895   |
| 1pic_v | P85A   | 9  | 3.498 | 0.3886 | 1.09364    |
| 1mp8_v | FAK1   | 7  | 3.498 | 0.4996 | 0.646695   |
| 1sm2_v | Q08881 | 6  | 3.496 | 0.5827 | 0.843187   |
| 3f7i_v | Q96CA5 | 9  | 3.493 | 0.3882 | 1.01351    |
| 1rct_v | PNPH   | 5  | 3.489 | 0.6978 | 1.87496    |
| 3ljr_v | GSTT2  | 11 | 3.488 | 0.3171 | -0.0805052 |
| 1i0z_v | P07195 | 8  | 3.488 | 0.436  | 1.36871    |
| 1uzf_v | ACE    | 7  | 3.485 | 0.4979 | 0.29428    |
| 1fw1_v | O43708 | 10 | 3.479 | 0.3479 | 0.649371   |
| 1jcn_v | IMDH1  | 7  | 3.478 | 0.4969 | 0.749099   |
| 3c4f_v | FGFR1  | 7  | 3.475 | 0.4964 | 0.964051   |
| 1ryf_v | RAC1   | 11 | 3.472 | 0.3157 | 0.229727   |
| 1nuh_v | G6PI   | 8  | 3.469 | 0.4336 | 0.417828   |
| 1k6m_v | P07953 | 11 | 3.467 | 0.3152 | 0.0195035  |
| 2c6c_v | FOLH1  | 8  | 3.457 | 0.4321 | 0.969655   |
| 1fro_v | LGUL   | 9  | 3.455 | 0.3839 | 0.677767   |
| 1hy3_v | ST1E1  | 8  | 3.455 | 0.4318 | 0.838471   |
| 1e2s_v | ARSA   | 6  | 3.454 | 0.5757 | 1.25595    |
| 1q5h_v | DUT    | 10 | 3.453 | 0.3453 | 0.049557   |
| 1m7b_v | P61587 | 10 | 3.452 | 0.3452 | 0.304284   |
| 2bu5_v | PDK2   | 6  | 3.451 | 0.5751 | 0.601349   |
| 2f2s_v | P24752 | 8  | 3.451 | 0.4313 | 1.4388     |
| 1z6x_v | P18085 | 8  | 3.448 | 0.431  | 0.627941   |
| 1a4r_v | CDC42  | 8  | 3.442 | 0.4302 | 0.517926   |

|        |        |    |       |        |            |
|--------|--------|----|-------|--------|------------|
| 1li4_v | SAHH   | 6  | 3.439 | 0.5732 | 1.14504    |
| 2bxr_v | AOFA   | 13 | 3.437 | 0.2644 | 1.20569    |
| 1joc_v | Q15075 | 10 | 3.431 | 0.3431 | 0.119316   |
| 2rku_v | P53350 | 4  | 3.421 | 0.8551 | 1.55303    |
| 1ju6_v | TYSY   | 6  | 3.417 | 0.5695 | 1.22046    |
| 1u8e_v | DPP4   | 5  | 3.417 | 0.6833 | 1.58763    |
| 1mx9_v | EST1   | 5  | 3.416 | 0.6832 | 1.59818    |
| 1xjd_v | KPCT   | 7  | 3.416 | 0.488  | 0.512997   |
| 1nd5_v | PPAP   | 6  | 3.415 | 0.5691 | 0.639705   |
| 1pl6_v | DHSO   | 5  | 3.414 | 0.6829 | 0.827285   |
| 1bj4_v | GLYC   | 6  | 3.414 | 0.569  | 1.09102    |
| 1rlb_v | TTHY   | 10 | 3.413 | 0.3413 | -0.356085  |
| 1kpf_v | HINT1  | 9  | 3.413 | 0.3792 | 0.0810985  |
| 1ek6_v | GALE   | 9  | 3.412 | 0.3791 | 0.896848   |
| 1s3x_v | P08107 | 7  | 3.407 | 0.4867 | 0.661608   |
| 1oth_v | P00480 | 8  | 3.402 | 0.4253 | 0.489633   |
| 1wms_v | P51151 | 9  | 3.398 | 0.3775 | 0.591071   |
| 4lbd_v | RARG   | 10 | 3.395 | 0.3395 | 0.298232   |
| 1nxk_v | P49137 | 7  | 3.391 | 0.4844 | 0.522425   |
| 1rm8_v | MMP16  | 8  | 3.39  | 0.4237 | 0.632678   |
| 1c9h_v | FKB1B  | 9  | 3.389 | 0.3766 | 1.19745    |
| 1ne7_v | P46926 | 7  | 3.388 | 0.4839 | 1.03333    |
| 1ca7_v | MIF    | 4  | 3.386 | 0.8465 | 1.41865    |
| 1g1t_v | LYAM2  | 9  | 3.376 | 0.3751 | 0.462869   |
| 3g3m_v | P11172 | 6  | 3.372 | 0.562  | 1.20107    |
| 2b4y_v | SIRT5  | 14 | 3.367 | 0.2405 | 0.0224246  |
| 1mq4_v | STK6   | 10 | 3.366 | 0.3366 | -0.0461843 |
| 1z83_v | P00568 | 11 | 3.361 | 0.3055 | 0.472651   |
| 1qcf_v | HCK    | 7  | 3.356 | 0.4795 | 0.230886   |
| 1mqb_v | EPHA2  | 7  | 3.356 | 0.4794 | 0.778139   |
| 1jnk_v | MK10   | 12 | 3.355 | 0.2796 | -0.0935628 |
| 1irj_v | S10A9  | 7  | 3.349 | 0.4785 | 0.674847   |
| 2aeb_v | ARG1   | 7  | 3.348 | 0.4783 | 0.36229    |
| 1v4s_v | HXK4   | 8  | 3.341 | 0.4176 | 0.173028   |
| 1upr_v | Q9H4M7 | 7  | 3.338 | 0.4769 | 0.732293   |
| 1w7n_v | KAT1   | 6  | 3.336 | 0.5561 | 0.708      |
| 1sr7_v | PRGR   | 8  | 3.323 | 0.4154 | 0.419754   |
| 1le6_v | O15496 | 4  | 3.32  | 0.8301 | 1.18088    |
| 1t31_v | CMA1   | 8  | 3.32  | 0.415  | 0.3731     |
| 1z57_v | CLK1   | 7  | 3.319 | 0.4741 | 0.748301   |
| 1gkd_v | MMP9   | 7  | 3.317 | 0.4739 | 0.543979   |
| 1s0x_v | RORA   | 10 | 3.313 | 0.3313 | -0.0982565 |
| 1z6y_v | Q9Y689 | 9  | 3.313 | 0.3681 | 0.202742   |
| 1h1h_v | P12724 | 6  | 3.3   | 0.5499 | 0.709427   |
| 2fs8_v | TRYB2  | 8  | 3.294 | 0.4118 | 0.84229    |
| 1fm6_v | PPARG  | 4  | 3.293 | 0.8233 | 1.0015     |
| 1xts_v | Q62639 | 7  | 3.284 | 0.4692 | 0.975404   |
| 1qh5_v | Q16775 | 7  | 3.283 | 0.469  | 0.729827   |
| 1fls_v | MMP13  | 6  | 3.282 | 0.547  | 0.194417   |
| 1yq7_v | FPFS   | 8  | 3.277 | 0.4096 | -0.279553  |
| 2zm3_v | IGF1R  | 6  | 3.273 | 0.5455 | 0.631925   |

|        |        |    |       |        |            |
|--------|--------|----|-------|--------|------------|
| 1mq0_v | CDD    | 5  | 3.266 | 0.6533 | 1.15675    |
| 2p1u_v | RXRA   | 9  | 3.265 | 0.3628 | 0.131829   |
| 1x6v_v | O43252 | 7  | 3.265 | 0.4664 | 0.129389   |
| 2bk3_v | AOFB   | 7  | 3.26  | 0.4657 | -0.337618  |
| 1mlw_v | TPH1   | 7  | 3.257 | 0.4653 | 0.190453   |
| 1ros_v | MMP12  | 10 | 3.254 | 0.3254 | 0.0509563  |
| 1lg1_v | Q13231 | 8  | 3.251 | 0.4063 | 0.55659    |
| 1gz4_v | MAOM   | 5  | 3.246 | 0.6493 | 0.227483   |
| 1dkf_v | RARA   | 8  | 3.246 | 0.4057 | -0.0537564 |
| 1xkk_v | EGFR   | 9  | 3.241 | 0.3601 | 0.4463     |
| 1nrg_v | Q9NVS9 | 4  | 3.24  | 0.8101 | 0.84397    |
| 1hfc_v | P03956 | 8  | 3.237 | 0.4046 | 0.243603   |
| 2e2r_v | ERR3   | 5  | 3.234 | 0.6468 | 0.688864   |
| 3f82_v | P08581 | 11 | 3.225 | 0.2932 | -0.293815  |
| 1yvj_v | JAK3   | 6  | 3.221 | 0.5369 | 0.197259   |
| 1x9d_v | Q9UKM7 | 7  | 3.204 | 0.4577 | 0.523615   |
| 1xil_v | P04179 | 5  | 3.189 | 0.6377 | 0.776971   |
| 1yb5_v | QOR    | 10 | 3.139 | 0.3139 | 0.722689   |
| 1a2b_v | P61586 | 6  | 3.125 | 0.5208 | 0.817488   |
| 1u4m_v | CCL5   | 8  | 3.12  | 0.39   | 0.402523   |
| 1iz2_v | A1AT   | 6  | 3.119 | 0.5199 | 0.276781   |
| 1t32_v | CATG   | 7  | 3.1   | 0.4429 | -0.15553   |
| 3d2f_v | P32589 | 7  | 3.095 | 0.4422 | 0.280763   |
| 1xtj_v | Q13838 | 9  | 3.095 | 0.3439 | -0.419675  |
| 1mfv_v | P04745 | 6  | 3.059 | 0.5099 | 0.429137   |
| 1lzf_v | Q9NY01 | 6  | 3.057 | 0.5096 | 0.511334   |
| 1smo_v | Q9NP99 | 6  | 3.033 | 0.5054 | -0.218332  |
| 3bej_v | NR1H4  | 7  | 3.03  | 0.4329 | -0.159834  |
| 1dia_v | P11586 | 6  | 3.025 | 0.5041 | 0.144979   |
| 3c4c_v | BRAF1  | 8  | 3.024 | 0.378  | -0.485     |
| 1cza_v | HXK1   | 8  | 3.018 | 0.3773 | -0.435473  |
| 1hti_v | TPIS   | 6  | 3.015 | 0.5025 | -0.279898  |
| 1o6l_v | AKT2   | 7  | 3.002 | 0.4289 | 0.272611   |
| 2i47_v | ADA17  | 7  | 2.999 | 0.4284 | -0.216471  |
| 1j78_v | VTDB   | 4  | 2.993 | 0.7481 | -0.633348  |
| 1fe3_v | FABP7  | 7  | 2.99  | 0.4271 | -0.795713  |
| 1hak_v | ANXA5  | 4  | 2.989 | 0.7473 | -0.277221  |
| 1xap_v | RARB   | 9  | 2.988 | 0.332  | -0.719493  |
| 1pq6_v | NR1H2  | 10 | 2.984 | 0.2984 | -0.780303  |
| 2shp_v | PTN11  | 5  | 2.983 | 0.5966 | -0.501093  |
| 1xbb_v | KSYK   | 6  | 2.982 | 0.497  | -0.541154  |
| 1egc_v | ACADM  | 7  | 2.982 | 0.426  | 0.12316    |
| 1uki_v | MK08   | 3  | 2.981 | 0.9937 | 0.28923    |
| 1hov_v | MMP2   | 7  | 2.978 | 0.4254 | -0.184539  |
| 1rs0_v | CFAB   | 3  | 2.977 | 0.9924 | 0.274248   |
| 1w6j_v | ERG7   | 5  | 2.977 | 0.5954 | -0.0148019 |
| 1dic_v | CFAD   | 4  | 2.977 | 0.7441 | 0.331239   |
| 1wuu_v | GALK1  | 5  | 2.975 | 0.5951 | 0.197214   |
